# Supplementary material for: Spring snow albedo feedback over northern Eurasia: Comparing in situ measurements with reanalysis products
Source: Copernicus journal article supplement (doi:10.5194/tc-12-1887-2018), 2018-06-06
Supplement: Supplementary file 1 [file tc-12-1887-2018-supplement.pdf]

Supplement of The Cryosphere, 12, 1887–1898, 2018  
<https://doi.org/10.5194/tc-12-1887-2018-supplement>  
© Author(s) 2018. This work is distributed under  
the Creative Commons Attribution 4.0 License.

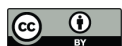

*Supplement of*

## **Spring snow albedo feedback over northern Eurasia: Comparing in situ measurements with reanalysis products**

**Martin Wegmann et al.**

*Correspondence to:* Martin Wegmann ([martin.wegmann@awi.de](mailto:martin.wegmann@awi.de))

The copyright of individual parts of the supplement might differ from the CC BY 4.0 License.

**Table 1: List of combined snow and albedo measuring stations used in this study**

| #  | WMO ID | Name                | Lat  | Lon   |
|----|--------|---------------------|------|-------|
| 1  | 37099  | Sochi               | 43.5 | 39.8  |
| 2  | 31959  | Rudnaja Pristan     | 44.4 | 135.9 |
| 3  | 34740  | Gigant              | 46.5 | 41.3  |
| 4  | 34646  | Chimljansk GMO      | 47.7 | 42.1  |
| 5  | 31707  | Ekaterino-Nikolskoe | 47.7 | 131.0 |
| 6  | 34561  | Volgograd SHI       | 48.7 | 44.4  |
| 7  | 31770  | Sovetskaja Gavan    | 49.0 | 140.3 |
| 8  | 31586  | Konstantinovka      | 49.6 | 127.9 |
| 9  | 30954  | Mangut              | 49.7 | 112.7 |
| 10 | 30965  | Borzja              | 50.4 | 116.5 |
| 11 | 32071  | Tjmovskoe           | 50.7 | 142.7 |
| 12 | 34139  | Kamennaja Step      | 51.1 | 40.7  |
| 13 | 30209  | Ershov              | 51.4 | 48.3  |
| 14 | 30825  | Ivolginsk           | 51.8 | 107.3 |
| 15 | 34059  | Rostoshi            | 51.9 | 43.7  |
| 16 | 30758  | Chita               | 52.1 | 113.5 |
| 17 | 31416  | Polinj Osipenko     | 52.4 | 136.5 |
| 18 | 31510  | Blagovezchenka      | 52.8 | 79.8  |
| 19 | 29849  | Kuzedeevo           | 53.3 | 87.2  |
| 20 | 30554  | Bagdarin            | 54.5 | 113.6 |
| 21 | 31174  | Bol'shoy Shantar    | 58.8 | 137.5 |
| 22 | 28624  | Kusharenkovo        | 55.1 | 55.4  |
| 23 | 28561  | Pamjatnaja          | 56.0 | 65.7  |
| 24 | 29664  | Nazarovo            | 56.0 | 90.3  |
| 25 | 29580  | Soljanka            | 56.2 | 95.3  |
| 26 | 30337  | Kazachinskoe        | 56.3 | 107.7 |
| 27 | 32389  | Kljuchi             | 56.3 | 160.8 |
| 28 | 28445  | Verhnee Dubrovo     | 56.7 | 61.1  |
| 29 | 30252  | Mamakan             | 57.8 | 114.0 |
| 30 | 29263  | Eniseysk            | 58.4 | 92.2  |
| 31 | 31004  | Aldan               | 58.6 | 125.4 |
| 32 | 31088  | Ohotsk              | 59.4 | 143.2 |
| 33 | 25913  | Magadan             | 59.5 | 150.7 |
| 34 | 24908  | Vanavara            | 60.3 | 102.3 |
| 35 | 24817  | Erbogachen          | 61.3 | 107.9 |
| 36 | 23707  | Ust -Vjm'           | 62.2 | 50.4  |
| 37 | 25705  | Srednikan           | 62.4 | 152.3 |
| 38 | 23734  | Oktiabr'skoe        | 52.4 | 66.0  |
| 39 | 24507  | Tura                | 64.3 | 100.3 |
| 40 | 23514  | Irael               | 64.4 | 55.2  |
| 41 | 23552  | Tarko-Sale          | 64.9 | 77.8  |
| 42 | 23472  | Turukhansk          | 65.8 | 87.9  |
| 43 | 24382  | Ust' Moma           | 66.5 | 143.2 |
| 44 | 23330  | Salehard GMO        | 65.5 | 66.6  |
| 45 | 22324  | Umba                | 66.7 | 34.3  |
| 46 | 23220  | Elechkaja           | 67.1 | 64.1  |
| 47 | 24125  | Olenek              | 68.5 | 112.4 |

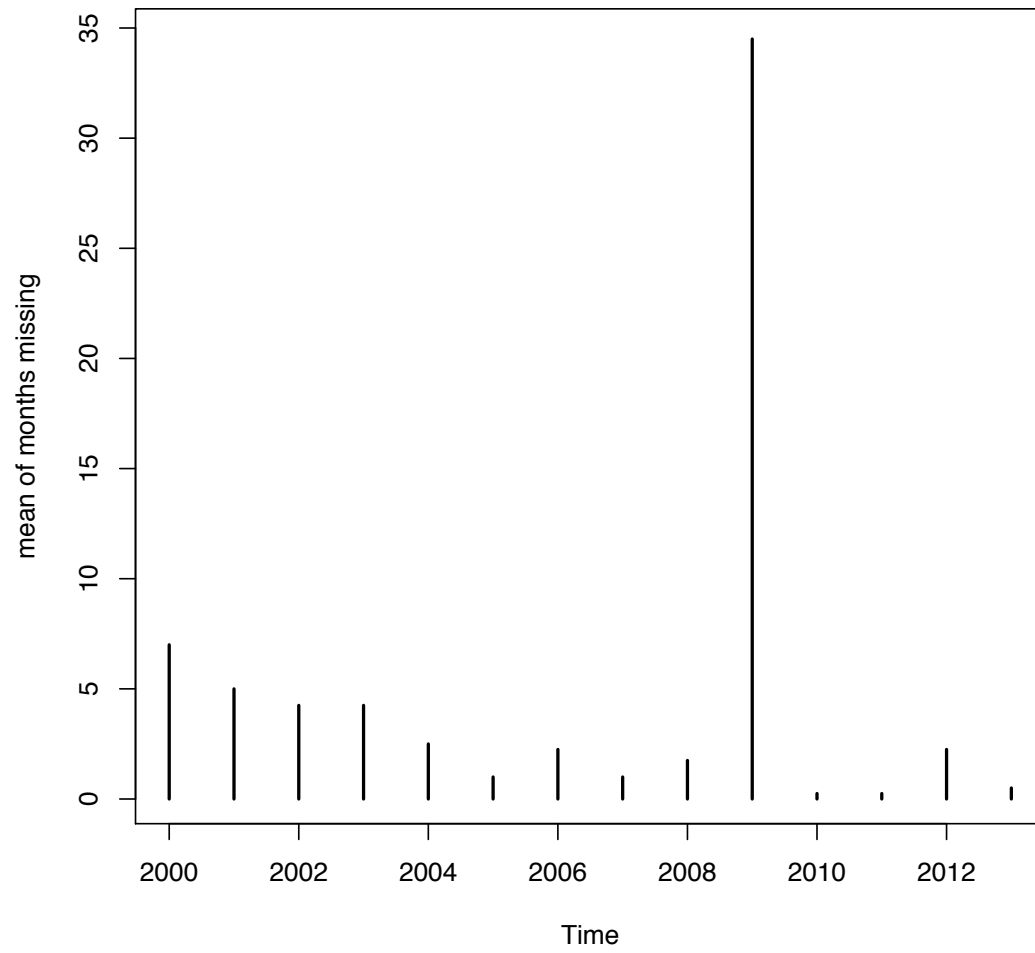

**Figure 1: Average amount of missing values per year within the 44 station network for MAMJ**

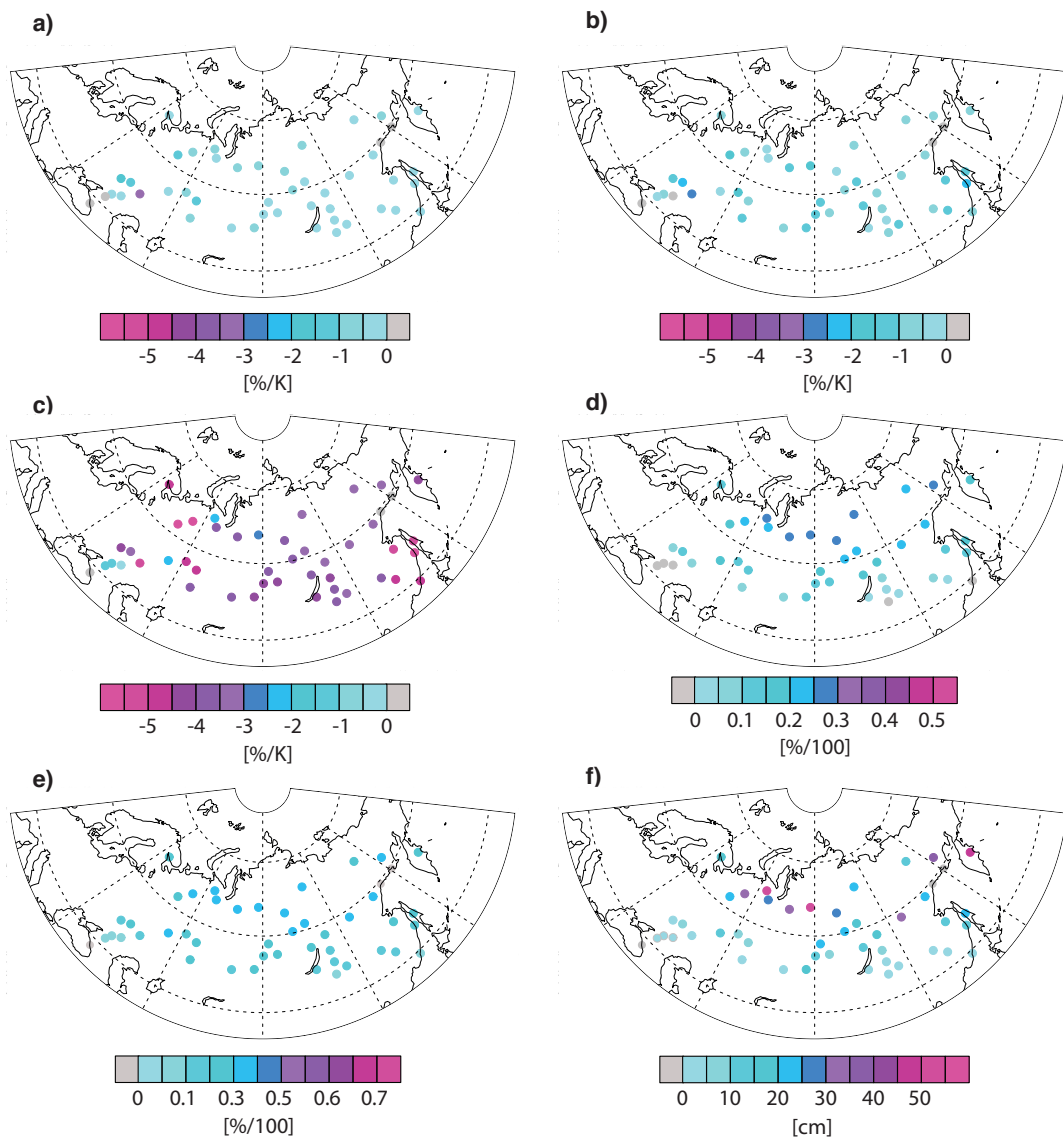

**Figure 2: Same as for Figure 3 in the main document but for MERRA2.**

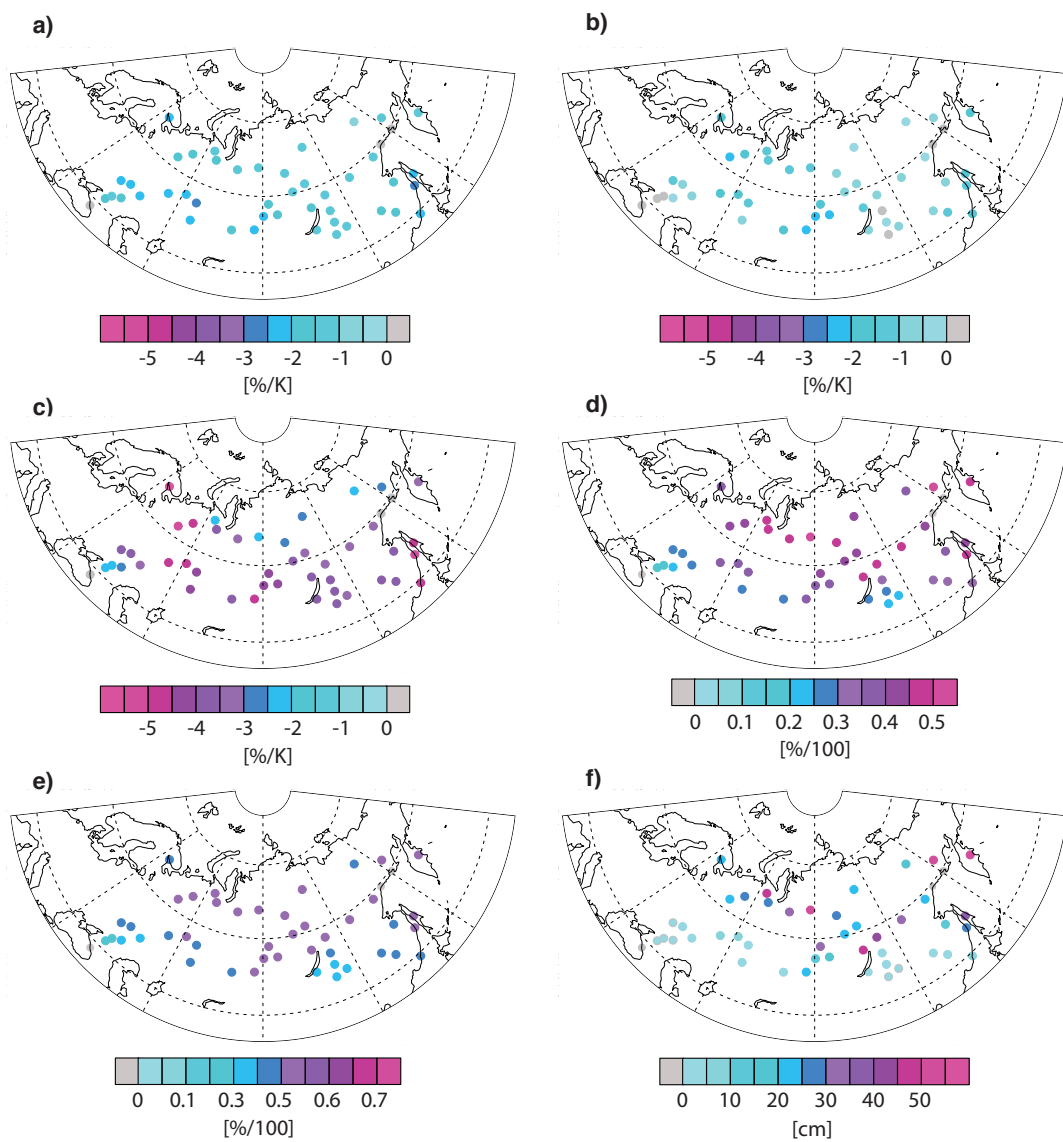

Figure 3: Same as for Figure 3 in the main document but for ERAI-LG.

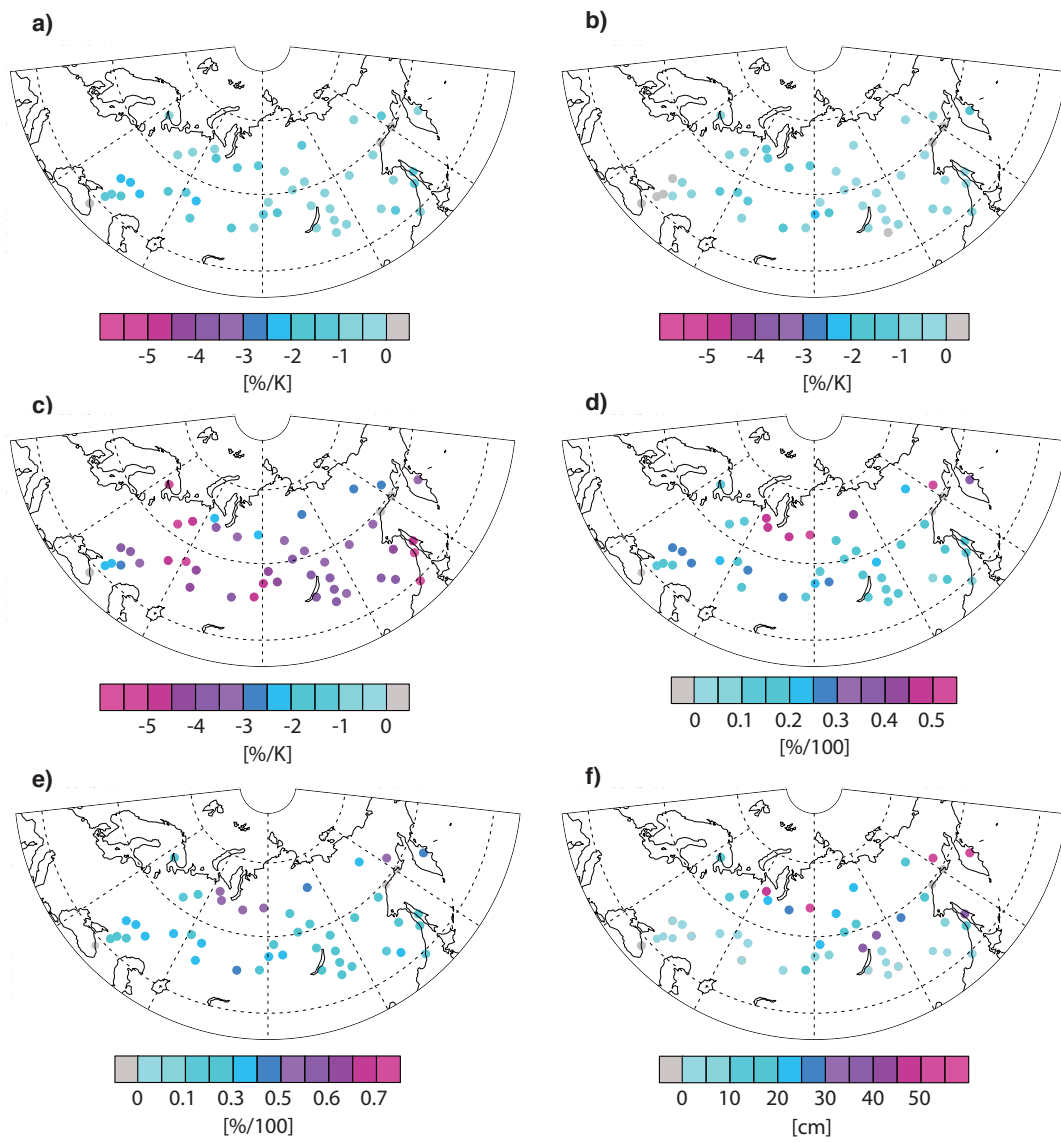

**Figure 4:** Same as for Figure 3 in the main document but for ERAI-L.

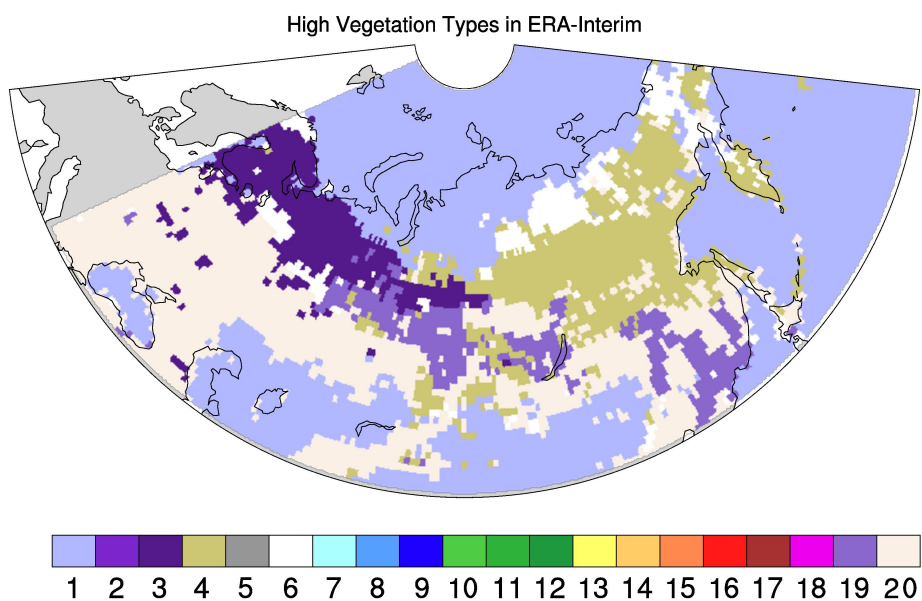

**Figure 2: High vegetation distribution for Northern Eurasia in ERA-Interim. For explanation of color code, see Table 2.**

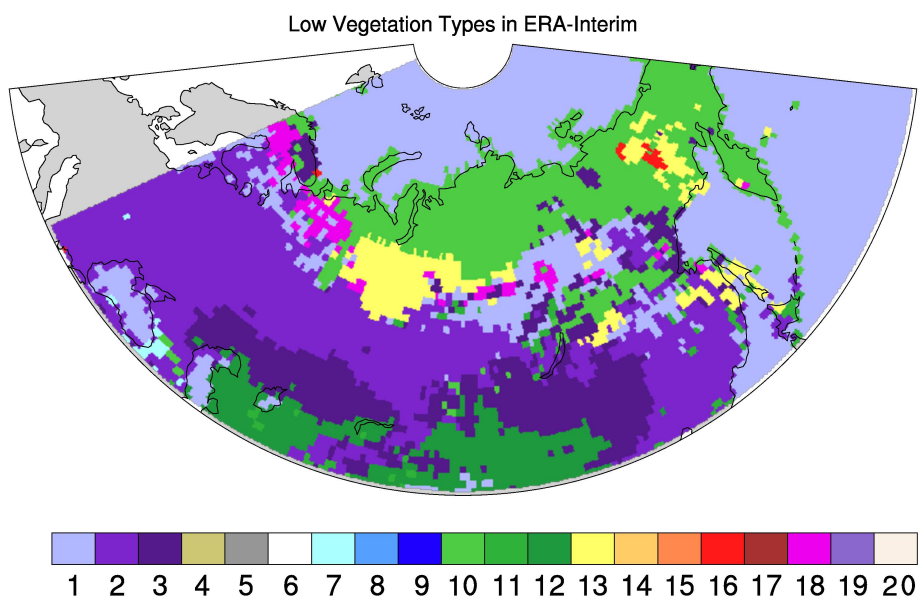

**Figure 3: Low vegetation distribution for Northern Eurasia in ERA-Interim. For explanation of color code, see Table 2.**

**Table 2: Color code explanation for Figures 5&6**

ERA-Interim vegetation types and parameter values. H/L refer to the distinction between high and low vegetation. cveg = vegetation cover fraction

| Index | Vegetation Type            | H/L | cveg |
|-------|----------------------------|-----|------|
| 1     | Crops, mixed farming       | L   | 0.90 |
| 2     | Short grass                | L   | 0.85 |
| 3     | Evergreen needleleaf trees | H   | 0.90 |
| 4     | Deciduous needleleaf trees | H   | 0.90 |
| 5     | Deciduous broadleaf trees  | H   | 0.90 |
| 6     | Evergreen broadleaf trees  | H   | 0.99 |
| 7     | Tall grass                 | L   | 0.70 |
| 8     | Desert                     | —   | 0    |
| 9     | Tundra                     | L   | 0.50 |
| 10    | Irrigated crops            | L   | 0.90 |
| 11    | Semidesert                 | L   | 0.10 |
| 12    | Ice caps and glaciers      | —   | —    |
| 13    | Bogs and marshes           | L   | 0.60 |
| 14    | Inland water               | —   | —    |
| 15    | Ocean                      | —   | —    |
| 16    | Evergreen shrubs           | L   | 0.50 |
| 17    | Deciduous shrubs           | L   | 0.50 |
| 18    | Mixed forest / woodland    | H   | 0.90 |
| 19    | Interrupted forest         | H   | 0.90 |
| 20    | Water and land mixtures    | L   | 0.60 |

## **Aerosol impact on albedo changes**

Using the MERRA2 aerosol product, we find a few days per station that show a co-existence between days with constant day-to-day snow depth (no snowfall or melt event), albedo decrease and strong (>75% percentile event for a location timeseries) aerosol deposition, both in stations and MERRA2 (not shown). We realize however, that there are other drivers for a local albedo decrease, which we are not able to isolate. Therefore, aerosols can modulate the albedo variability during periods of constant snow depth and are a good addition in reanalysis datasets. How big the quantitativ impact in the reanalysis really is, remains an open question. Further studies are needed to investigate the impact of aerosols on snow albedo representation.
